# Supplementary material
Source: ML conference proceedings conference paper supplement (https://openreview.net/forum?id=_KhlwS9oFBp)
Supplement: supplementary_material [file attachment]

# Rate-Optimal Subspace Estimation on Random Graphs

Zhixin Zhou<sup>1</sup>, Fan Zhou<sup>2</sup>, Ping Li<sup>2</sup>, and Cun-Hui Zhang<sup>3</sup>

<sup>1</sup>Department of Management Sciences, City University of Hong Kong

<sup>2</sup>Cognitive Computing Lab, Baidu Research

<sup>3</sup>Department of Statistics, Rutgers University

<sup>1</sup>zhixzhou@cityu.edu.hk, <sup>2</sup>{zfyde001, pingli98}@gmail.com, <sup>3</sup>cunhui@stat.rutgers.edu

## A Proof of Theorem 1

**For operator norm.** Let  $\hat{\mathbf{M}}$  be obtained from the last step of the algorithm, then by [16, Theorem 2.1],  $\mathbf{A}_{\text{re}}$  satisfies

$$\mathbb{P}(\|\mathbf{A}_{\text{re}} - \mathbf{M}\|_{\text{op}} \lesssim \sqrt{n_1 p}) \geq 1 - n_1^{-1}. \quad (16)$$

By triangle inequality, we have

$$\|\hat{\mathbf{M}} - \mathbf{M}\|_{\text{op}} \leq \|\hat{\mathbf{M}} - \mathbf{A}_{\text{re}}\|_{\text{op}} + \|\mathbf{A}_{\text{re}} - \mathbf{M}\|_{\text{op}}. \quad (17)$$

Now it remains to find the upper bound for  $\|\hat{\mathbf{M}} - \mathbf{A}_{\text{re}}\|_{\text{op}}$ . We have

$$\mathbf{A}_{\text{re}} - \hat{\mathbf{M}} = \sum_{i=1}^{n_2} \sigma_i(\mathbf{A}_{\text{re}}) \mathbf{U}_i \mathbf{V}_i^{\top} - \sum_{i=1}^{r'} \sigma_i(\mathbf{A}_{\text{re}}) \mathbf{U}_i \mathbf{V}_i^{\top} = \sum_{i=r'+1}^{n_2} \sigma_i(\mathbf{A}_{\text{re}}) \mathbf{U} \mathbf{V}^{\top}$$

Therefore,  $\|\hat{\mathbf{M}} - \mathbf{A}_{\text{re}}\|_{\text{op}} = \sigma_{r'+1}(\mathbf{A}_{\text{re}})$ . Now it is sufficient to show that  $\sigma_{r'+1}(\mathbf{A}_{\text{re}}) \lesssim \sqrt{n_1 p}$  with high probability. Suppose  $r' = r$ , then  $\sigma_{r'+1}(\mathbf{M}) = 0$ . Suppose  $r' = \lfloor n_2 p \rfloor$ , then applying  $\text{tr}(\mathbf{M}^{\top} \mathbf{M}) \leq n_1 n_2 p^2$ ,

$$\sigma_{r'+1}(\mathbf{M}) \leq \sqrt{\frac{\text{tr}(\mathbf{M}^{\top} \mathbf{M})}{r' + 1}} \leq \sqrt{\frac{\text{tr}(\mathbf{M}^{\top} \mathbf{M})}{n_2 p}} \leq \sqrt{n_1 p}. \quad (18)$$

By Weyl's inequality (Theorem 6), on the event  $\|\mathbf{A}_{\text{re}} - \mathbf{M}\|_{\text{op}} \lesssim \sqrt{n_1 p}$ ,

$$\sigma_{r'+1}(\mathbf{A}_{\text{re}}) \leq \sigma_{r'+1}(\mathbf{M}) + \|\mathbf{A}_{\text{re}} - \mathbf{M}\|_{\text{op}} \lesssim \sqrt{n_1 p}. \quad (19)$$

with probability at least  $1 - n_1^{-1}$ . This completes the proof for  $\|\hat{\mathbf{M}} - \mathbf{M}\|_{\text{op}} \lesssim \sqrt{n_1 p}$  with high probability. For  $\|\hat{\mathbf{M}} - \mathbf{M}\|_{\text{op}} \lesssim \sqrt{n_1 n_2 p^2}$ , it is sufficient to show that  $\|\hat{\mathbf{M}} - \mathbf{M}\|_{\text{F}} \lesssim \sqrt{n_1 n_2 p^2}$ . This will be proved as follows.

**For Frobenius norm.** Case 1:  $r' = r$ . Since  $\hat{\mathbf{M}}$  and  $\mathbf{M}$  has at most rank  $r$ ,  $\text{rank}(\hat{\mathbf{M}} - \mathbf{M}) \leq 2r$ . Thus,

$$\|\hat{\mathbf{M}} - \mathbf{M}\|_{\text{F}} \leq \sqrt{2r} \|\hat{\mathbf{M}} - \mathbf{M}\|_{\text{op}} \lesssim 2\sqrt{2n_1 p r},$$

which gives the desired result.

Case 2:  $r' = \lfloor n_2 p \rfloor$ . Let

$$\mathcal{T}_{r'}(\mathbf{M}) = \sum_{i=1}^{r'} \sigma_i(\mathbf{M}) \mathbf{U} \mathbf{V}^{\top},$$

then by triangle inequality,

$$\|\hat{\mathbf{M}} - \mathbf{M}\|_{\text{F}} \leq \|\hat{\mathbf{M}} - \mathcal{T}_{r'}(\mathbf{M})\|_{\text{F}} + \|\mathcal{T}_{r'}(\mathbf{M}) - \mathbf{M}\|_{\text{F}}.$$

For the first term, on the event  $\|\hat{\mathbf{M}} - \mathbf{M}\|_{\text{op}} \lesssim \sqrt{n_1 p}$ , the first term on the right hand side of the previous equation is bounded by

$$\begin{aligned} \|\hat{\mathbf{M}} - \mathcal{T}_{r'}(\mathbf{M})\|_{\text{F}} &\leq \sqrt{r'} \|\hat{\mathbf{M}} - \mathcal{T}_{r'}(\mathbf{M})\|_{\text{op}} \\ &\leq \sqrt{n_2 p} (\|\hat{\mathbf{M}} - \mathbf{M}\|_{\text{op}} + \|\mathbf{M} - \mathcal{T}_{r'}(\mathbf{M})\|_{\text{op}}) \\ &\lesssim \sqrt{n_2 p} (\sqrt{n_1 p} + \sigma_{r'+1}(\mathbf{M})) \\ &\lesssim \sqrt{n_1 n_2 p^2}. \end{aligned}$$

where we have applied (18) in the last inequality. Now for the other term,

$$\|\mathcal{T}_{r'}(\mathbf{M}) - \mathbf{M}\|_{\text{F}} \leq 2\|\mathbf{M}\|_{\text{F}} \leq 2\sqrt{\text{tr}(\mathbf{M}^{\top} \mathbf{M})} \leq 2\sqrt{n_1 n_2 p^2}.$$

Therefore,  $\|\hat{\mathbf{M}} - \mathbf{M}\|_{\text{F}} \lesssim \sqrt{n_1 n_2 p^2}$  with probability at least  $1 - n_1^{-1}$ .

## B Proof of Theorem 2

We denote the output of Theorem 1 by  $\hat{\mathbf{M}}_1$  and the output of Theorem 2 by  $\hat{\mathbf{M}}_2$ . We will prove the following result on the event  $\|\mathbf{A}_{\text{re}} - \mathbf{M}\|_{\text{op}} \lesssim \sqrt{n_1 p}$ .

**For operator norm.** To prove  $\|\hat{\mathbf{M}}_2 - \mathbf{M}\|_{\text{op}} \lesssim \sqrt{n_1 p}$ , it is sufficient to show that  $\|\hat{\mathbf{M}}_1 - \hat{\mathbf{M}}_2\|_{\text{op}} \lesssim \sqrt{n_1 p}$ . Using the definition of these two estimators,

$$\|\hat{\mathbf{M}}_1 - \hat{\mathbf{M}}_2\|_{\text{op}} = \sigma_{r'+1}(\mathbf{A}_{\text{re}}).$$

Then the proof is complete by applying (19). Now we need to show  $\|\hat{\mathbf{M}}_2 - \mathbf{M}\|_{\text{op}} \lesssim \sqrt{n_1 n_2 p^2}$ . Since the operator norm is bounded by the Frobenius norm, we only need to prove  $\|\hat{\mathbf{M}}_2 - \mathbf{M}\|_{\text{F}} \lesssim \sqrt{n_1 n_2 p^2}$ . See the following proof for this bound.

**For Frobenius norm.** Case 1:  $r' = r$ . Applying (18), we have

$$\|\hat{\mathbf{M}}_1 - \hat{\mathbf{M}}_2\|_{\text{F}} \leq \sigma_{r'+1} r' \lesssim \sqrt{n_1 p r}.$$

Combining the result of Theorem 3, it shows  $\|\hat{\mathbf{M}}_2 - \mathbf{M}\|_{\text{F}} \lesssim \sqrt{n_1 p r}$ .

Case 2:  $r' = \lfloor n_2 p \rfloor$ . Since the inequality  $\|\hat{\mathbf{M}}_2 - \mathbf{M}\|_{\text{op}} \lesssim \sqrt{n_1 p}$  still holds, the proof is identical the Case 2 for Frobenius norm of the proof of Theorem 1.

## C Proof of Theorem 3

Firstly, we will prove (7). The proof is an application of Fano's inequality. We assume  $n_1 \geq n_2$  without loss of generality in this proof. We first derive the packing number of the parameter space  $\Theta = \Theta_1(n_1, n_2, p, r)$  equipped with Frobenius norm.

**Lemma 1.** For  $p \in (0, 1]$  and positive integers  $n_1, n_2 \geq r$ , there exists a finite subset of the parameter space  $\Theta_1(n_1, n_2, p, r)$  satisfying

- (a) The cardinality of this subset is at least  $\exp\left(\frac{n_1 r}{5}\right)$ .
- (b) For every  $\mathbf{M}$  and  $\tilde{\mathbf{M}}$  in this subset,  $\frac{(n_1 p r) \wedge (n_1 n_2 p^2)}{5000} \leq \|\mathbf{M} - \tilde{\mathbf{M}}\|_{\text{F}}^2 \leq \frac{n_1 p r}{625}$ .
- (c) For every  $\mathbf{M}$  and  $\tilde{\mathbf{M}}$  in this subset,  $\mathbf{M}_{ij} = 0$  if and only if  $\tilde{\mathbf{M}}_{ij} = 0$ . That is,  $\{(i, j) : \mathbf{M}_{ij} = 0\} = \{(i, j) : \tilde{\mathbf{M}}_{ij} = 0\}$
- (d) For  $\mathbf{M}$  in this subset, if  $\mathbf{M} \neq 0$ , then  $\mathbf{M}_{ij} \in \left[\frac{12p}{25}, \frac{13p}{25}\right]$ .

*Proof.* Let us define random matrix

$$\mathbf{M} = \frac{p}{2}(\mathbf{1}_{n_1 \times (r \lfloor \frac{n_2}{r} \wedge \frac{1}{p} \rfloor)}, \mathbf{O}) + \frac{1}{50}p(\mathbf{U}, \dots, \mathbf{U}, \mathbf{O})$$

where  $\mathbf{U} \in \mathbb{R}^{n_1 \times r}$  with i.i.d. rademacher entries and  $\mathbf{U}$  is repeated  $\lfloor \frac{n_2}{r} \wedge \frac{1}{p} \rfloor$  many times, and  $\mathbf{O}$  is a zero matrix with dimension  $n_1 \times (n_2 - r \lfloor \frac{n_2}{r} \wedge \frac{1}{p} \rfloor)$ . Let  $\tilde{\mathbf{U}}$  be an independent copy of  $\mathbf{U}$ , and construct  $\tilde{\mathbf{M}}$  by  $\tilde{\mathbf{U}}$  as an independent copy of  $\mathbf{M}$ . In particular,  $\mathbf{M}_{ij} \in \{0, \frac{12p}{25}, \frac{13p}{25}\}$ , so condition (c) and (d) satisfied. Then  $\|\mathbf{U} - \tilde{\mathbf{U}}\|_F^2 \leq 4n_1r$ . Therefore,

$$\|\mathbf{M} - \tilde{\mathbf{M}}\|_F^2 = \frac{1}{2500}p^2 \lfloor \frac{n_2}{r} \wedge \frac{1}{p} \rfloor \|\mathbf{U} - \tilde{\mathbf{U}}\|_F^2 \leq \frac{n_1pr}{625}.$$

Hence, the upper bound of condition (b) is satisfied. On the other hand, since  $\frac{n_2}{r} \wedge \frac{1}{p} \geq 1$ ,  $\lfloor \frac{n_2}{r} \wedge \frac{1}{p} \rfloor \geq \frac{1}{2}(\frac{n_2}{r} \wedge \frac{1}{p})$ . Thus,

$$\|\mathbf{M} - \tilde{\mathbf{M}}\|_F^2 = \frac{1}{2500}p^2 \lfloor \frac{n_2}{r} \wedge \frac{1}{p} \rfloor \|\mathbf{U} - \tilde{\mathbf{U}}\|_F^2 \geq \frac{1}{5000}(p \wedge \frac{n_2p^2}{r}) \|\mathbf{U} - \tilde{\mathbf{U}}\|_F^2.$$

By Hoeffding's inequality,

$$\begin{aligned} \mathbb{P}\left(\|\mathbf{U} - \tilde{\mathbf{U}}\|_F^2 \leq n_1r\right) &= \mathbb{P}\left(\frac{1}{n_1} \sum_{i=1}^{n_1} \sum_{j=1}^r (\varepsilon_{ij} - \tilde{\varepsilon}_{ij})^2 \leq r\right) \\ &= \mathbb{P}\left(\frac{1}{2} \sum_{i=1}^{n_1} \sum_{j=1}^r [(\varepsilon_{ij} - \tilde{\varepsilon}_{ij})^2 - 2] \leq \frac{n_1(r-2r)}{2}\right) \\ &\leq \exp\left(-\frac{n_1r}{2}\right). \end{aligned}$$

Suppose  $\|\mathbf{U} - \tilde{\mathbf{U}}\|_F^2 > n_1r$ , then  $\|\mathbf{M} - \tilde{\mathbf{M}}\|_F^2 > \frac{(n_1pr) \wedge (n_1n_2p^2)}{5000}$  gives the lower bound of condition (b). Now we consider  $N = e^{n_1r/5}$  i.i.d. copies. Let  $\mathbf{M}^{(m)}$ ,  $m \in [N]$  be  $N$  independent copies of  $\mathbf{M}$ , then we have

$$\begin{aligned} \mathbb{P}\left(\min_{m, m' \in [N]} \|\mathbf{M}^{(m)} - \mathbf{M}^{(m')}\|_F^2 > \frac{(n_1pr) \wedge (n_1n_2p^2)}{5000}\right) &\geq 1 - N^2 \exp\left(-\frac{n_1r}{2}\right) \\ &\geq 1 - \exp\left(-\frac{n_1r}{10}\right). \end{aligned}$$

Therefore, we can draw  $N$  i.i.d. copies of  $\mathbf{M}$  to fulfill the requirements in the lemma with positive probability.  $\square$

Now we introduce the Fano's inequality. We will use the version provided by [24] in our proofs.

**Lemma 2** (Fano's inequality). *Assume  $N \geq 3$  and suppose  $\{\theta_1, \dots, \theta_N\} \subset \Theta$  such that*

- (i) *for all  $1 \leq i < j \leq N$ ,  $d(\theta_i, \theta_j) \geq 2\alpha$ , where  $d$  is a metric on  $\Theta$ ;*
- (ii) *let  $P_i$  be the distribution with respect to parameter  $\theta_i$ , then for all  $i, j \in [N]$ ,  $P_i$  is absolutely continuous with respect to  $P_j$ ;*
- (iii) *for all  $i, j \in [N]$ , the Kullback-Leibler divergence  $D_{KL}(P_i \| P_j) \leq \beta \log(N-1)$  for some  $0 < \beta < 1/8$ .*

Then

$$\inf_{\hat{\theta}} \sup_{\theta \in \Theta} \mathbb{P}(d(\hat{\theta}, \theta) \geq \alpha) \geq \frac{\sqrt{N-1}}{1 + \sqrt{N-1}} \left(1 - 2\beta - \sqrt{\frac{2\beta}{\log(N-1)}}\right). \quad (20)$$

**Lemma 3.** For random adjacency matrix model (1) with parameters  $\mathbf{M}, \tilde{\mathbf{M}} \in [a, b]^{n_1 \times n_2}$ , their Kullback-Leibler divergence is upper bounded by

$$D_{\text{KL}}(P_{\mathbf{M}} \| P_{\tilde{\mathbf{M}}}) \leq \frac{\|\mathbf{M} - \tilde{\mathbf{M}}\|_F^2}{a(1-b)}.$$

*Proof.* We firstly consider entrywise KL-divergence. For  $p, q \in [a, b]$ ,

$$\begin{aligned} D_{\text{KL}}(\text{Ber}(p) \| \text{Ber}(q)) &= p \log \frac{p}{q} + (1-p) \log \frac{1-p}{1-q} \\ &= p \log \left(1 + \frac{p-q}{q}\right) + (1-p) \log \left(1 - \frac{p-q}{1-q}\right) \\ &\leq p \left(\frac{p-q}{q}\right) + (1-p) \left(-\frac{p-q}{1-q}\right) \\ &= \frac{p(p-q)(1-q) - q(1-p)(p-q)}{q(1-q)} \\ &= \frac{(p-q)^2}{q(1-q)} \leq \frac{(p-q)^2}{a(1-b)}. \end{aligned}$$

By independence of each entry, we have  $D_{\text{KL}}(P_{\mathbf{M}} \| P_{\tilde{\mathbf{M}}}) \leq \frac{\|\mathbf{M} - \tilde{\mathbf{M}}\|_F^2}{a(1-b)}$ .  $\square$

Now we are ready to prove (7). Let  $\Theta$  in Lemma 2 with  $N = \exp\left(\frac{n_1 r}{5}\right)$ . For distinct  $\mathbf{M}, \tilde{\mathbf{M}} \in \Theta$ ,

$$D_{\text{KL}}(P_{\mathbf{M}} \| P_{\tilde{\mathbf{M}}}) \leq \frac{\|\mathbf{M} - \tilde{\mathbf{M}}\|_F^2}{\left(\frac{12}{25}p\right)\left(1 - \frac{13}{25}p\right)} \leq \frac{n_1 p r}{625\left(\frac{12}{25}p\right)\left(1 - \frac{13}{25}p\right)} \leq \frac{n_1 r}{144}.$$

Let  $\beta = 1/24$ . For  $n_1 \geq 10$ ,  $\log(N-1) \geq n_1 r/6$ . Therefore,

$$D_{\text{KL}}(P_{\mathbf{M}} \| P_{\tilde{\mathbf{M}}}) \leq \frac{n_1 r}{144} \leq \beta \log(N-1).$$

On the other hand, the lower bound on the Frobenius norm satisfies

$$\|\mathbf{M} - \tilde{\mathbf{M}}\|_F \geq 2\alpha := \sqrt{\frac{(n_1 p r) \wedge (n_1 n_2 p^2)}{5000}}.$$

and  $D_{\text{KL}}(P_{\mathbf{M}} \| P_{\tilde{\mathbf{M}}}) \leq \beta n_1 r/6$  for every pair of distinct elements  $\mathbf{M}$  and  $\tilde{\mathbf{M}}$  in the subset. Then by (20) and straightforward algebra,

$$\inf_{\tilde{\mathbf{M}}} \sup_{\mathbf{M}} \mathbb{P} \left( \|\hat{\mathbf{M}} - \mathbf{M}\|_F^2 \geq \frac{(n_1 p r) \wedge (n_1 n_2 p^2)}{20000} \right) \geq \frac{1}{2}.$$

To verify (6), it suffices to observe that

$$\|\hat{\mathbf{M}} - \mathbf{M}\|_F^2 \geq \|\hat{\mathbf{M}} - \mathbf{M}\|_{\text{op}}^2.$$

for any  $\hat{\mathbf{M}}$  and  $\mathbf{M}$  and consider a restriction on the submodel  $\Theta = \Theta_1(n_1, n_2, p, 1)$ .

## D Proof of Theorem 4

**Lemma 4** (Davis-Kahan theorem for eigenspaces). For symmetric matrices  $\mathbf{M}, \hat{\mathbf{M}} \in \mathbb{R}^{n \times n}$ , suppose  $\mathbf{M} = \mathbf{U}_1 \mathbf{\Lambda}_1 \mathbf{U}_1^\top + \mathbf{U}_2 \mathbf{\Lambda}_2 \mathbf{U}_2^\top$  and  $\hat{\mathbf{M}} = \hat{\mathbf{U}}_1 \hat{\mathbf{\Lambda}}_1 \hat{\mathbf{U}}_1^\top + \hat{\mathbf{U}}_2 \hat{\mathbf{\Lambda}}_2 \hat{\mathbf{U}}_2^\top$  where  $(\mathbf{U}_1, \mathbf{U}_2), (\hat{\mathbf{U}}_1, \hat{\mathbf{U}}_2) \in \mathbb{R}^{n_1 \times n_2}$  are orthogonal. Suppose the singular values of  $\mathbf{\Lambda}_1$  are contained in the interval  $[a, b]$ , and the singular values of  $\hat{\mathbf{\Lambda}}_2$  are excluded from  $(a - \delta, b + \delta)$ , then

$$\|\hat{\mathbf{U}}_2^\top \mathbf{U}_1\| \leq \frac{\|\hat{\mathbf{M}} - \mathbf{M}\| + \|\hat{\mathbf{\Lambda}}_2 - \mathbf{\Lambda}_2\|}{\delta} \quad (21)$$

for  $\|\cdot\|$  is either Frobenius norm or operator norm.

*Proof.* Since  $\mathbf{U}_1^\top \mathbf{U}_1 = \mathbf{I}$  and  $\mathbf{U}_2^\top \mathbf{U}_1 = 0$ ,

$$\mathbf{M}\mathbf{U}_1 = (\mathbf{U}_1 \mathbf{\Lambda}_1 \mathbf{U}_1^\top + \mathbf{U}_2 \mathbf{\Lambda}_2 \mathbf{U}_2^\top) \mathbf{U}_1 = \mathbf{U}_1 \mathbf{\Lambda}_1.$$

In the same way, we have  $\hat{\mathbf{U}}_2^\top \hat{\mathbf{M}} = \hat{\mathbf{\Lambda}}_2 \hat{\mathbf{U}}_2^\top$ . It follows that

$$\hat{\mathbf{U}}_2^\top (\hat{\mathbf{M}} - \mathbf{M}) \mathbf{U}_1 = \hat{\mathbf{U}}_2^\top \hat{\mathbf{M}} \mathbf{U}_1 - \hat{\mathbf{U}}_2^\top \mathbf{M} \mathbf{U}_1 = \hat{\mathbf{\Lambda}}_2 \hat{\mathbf{U}}_2^\top \mathbf{U}_1 - \hat{\mathbf{U}}_2^\top \mathbf{U}_1 \mathbf{\Lambda}_1. \quad (22)$$

Since  $\mathbf{U}_1$  and  $\hat{\mathbf{U}}_2$  have orthonormal columns,

$$\|(\mathbf{\Lambda}_2 - \hat{\mathbf{\Lambda}}_2) \hat{\mathbf{U}}_2^\top \mathbf{U}_1\| \leq \|\mathbf{\Lambda}_2 - \hat{\mathbf{\Lambda}}_2\| \|\hat{\mathbf{U}}_2^\top \mathbf{U}_1\|_{\text{op}} \leq \|\mathbf{\Lambda}_2 - \hat{\mathbf{\Lambda}}_2\|. \quad (23)$$

We combine (22) and (23), for any real number  $c$ ,

$$\begin{aligned} \|\mathbf{\Lambda}_2 - \hat{\mathbf{\Lambda}}_2\| + \|\hat{\mathbf{U}}_2 (\hat{\mathbf{M}} - \mathbf{M}) \mathbf{U}_1\| &\geq \|(\mathbf{\Lambda}_2 - \hat{\mathbf{\Lambda}}_2) \hat{\mathbf{U}}_2^\top \mathbf{U}_1\| + \|\hat{\mathbf{\Lambda}}_2 \hat{\mathbf{U}}_2^\top \mathbf{U}_1 - \hat{\mathbf{U}}_2 \mathbf{U}_1 \mathbf{\Lambda}_1\| \\ &\geq \|\mathbf{\Lambda}_2 \hat{\mathbf{U}}_2^\top \mathbf{U}_1 - \hat{\mathbf{U}}_2^\top \mathbf{U}_1 \mathbf{\Lambda}_1\| \\ &= \|(\mathbf{\Lambda}_2 - c\mathbf{I}) \hat{\mathbf{U}}_2^\top \mathbf{U}_1 - \hat{\mathbf{U}}_2 \mathbf{U}_1 (\mathbf{\Lambda}_1 - c\mathbf{I})\| \\ &\geq \|(\mathbf{\Lambda}_2 - c\mathbf{I}) \hat{\mathbf{U}}_2^\top \mathbf{U}_1\| - \|\hat{\mathbf{U}}_2 \mathbf{U}_1 (\mathbf{\Lambda}_1 - c\mathbf{I})\|. \end{aligned}$$

Now we let  $c = (a + b)/2$  and  $r = (b - a)/2$ , then the eigenvalues of  $\mathbf{\Lambda}_1 - c\mathbf{I}$  are contained in  $[-r, r]$  and the eigenvalues of  $\hat{\mathbf{\Lambda}}_2 - c\mathbf{I}$  are excluded from  $(-r - \delta, r + \delta)$ . Therefore,

$$\|(\mathbf{\Lambda}_2 - c\mathbf{I}) \hat{\mathbf{U}}_2^\top \mathbf{U}_1\| \geq \frac{1}{\|(\mathbf{\Lambda}_2 - c\mathbf{I})^{-1}\|_{\text{op}}} \|\hat{\mathbf{U}}_2^\top \mathbf{U}_1\| \geq (r + \delta) \|\hat{\mathbf{U}}_2^\top \mathbf{U}_1\|,$$

and

$$\|\hat{\mathbf{U}}_2 \mathbf{U}_1 (\mathbf{\Lambda}_1 - c\mathbf{I})\| \leq \|\hat{\mathbf{U}}_2 \mathbf{U}_1\| \|\mathbf{\Lambda}_1 - c\mathbf{I}\|_{\text{op}} \leq r \|\hat{\mathbf{U}}_2 \mathbf{U}_1\|.$$

Hence, we can conclude that

$$\|\mathbf{\Lambda}_2 - \hat{\mathbf{\Lambda}}_2\| + \|\hat{\mathbf{U}}_2 (\hat{\mathbf{M}} - \mathbf{M}) \mathbf{U}_1\| \geq (r + \delta) \|\hat{\mathbf{U}}_2^\top \mathbf{U}_1\| - r \|\hat{\mathbf{U}}_2 \mathbf{U}_1\| \geq \delta \|\hat{\mathbf{U}}_2^\top \mathbf{U}_1\|.$$

$\|\hat{\mathbf{U}}_2 (\hat{\mathbf{M}} - \mathbf{M}) \mathbf{U}_1\| \leq \|\hat{\mathbf{U}}_2 (\hat{\mathbf{M}} - \mathbf{M}) (\mathbf{U}_1, \mathbf{U}_2)\| = \|\hat{\mathbf{U}}_2 (\hat{\mathbf{M}} - \mathbf{M})\|$ , and similarly,  $\|\hat{\mathbf{U}}_2 (\hat{\mathbf{M}} - \mathbf{M})\| \leq \|\hat{\mathbf{M}} - \mathbf{M}\|$ . Hence (21) is obtained.  $\square$

**Corollary 1** (Wedin's Theorem). *For real-valued matrices  $\mathbf{M}, \hat{\mathbf{M}} \in \mathbb{R}^{n_1 \times n_2}$ , suppose that  $\mathbf{M} = \mathbf{U}_1 \mathbf{\Lambda}_1 \mathbf{V}_1^\top + \mathbf{U}_2 \mathbf{\Lambda}_2 \mathbf{V}_2^\top$  and  $\hat{\mathbf{M}} = \hat{\mathbf{U}}_1 \hat{\mathbf{\Lambda}}_1 \hat{\mathbf{V}}_1^\top + \hat{\mathbf{U}}_2 \hat{\mathbf{\Lambda}}_2 \hat{\mathbf{V}}_2^\top$  are the singular value decompositions so that  $(\mathbf{U}_1, \mathbf{U}_2), (\hat{\mathbf{U}}_1, \hat{\mathbf{U}}_2) \in \mathbb{R}^{n_1 \times n_1}, (\mathbf{V}_1, \mathbf{V}_2), (\hat{\mathbf{V}}_1, \hat{\mathbf{V}}_2) \in \mathbb{R}^{n_2 \times n_2}$  are orthogonal, and  $\mathbf{\Lambda}_1, \mathbf{\Lambda}_2$  are diagonal. Suppose*

$$0 \leq \min(\text{diag}(\mathbf{\Lambda}_1)) \leq \max(\text{diag}(\mathbf{\Lambda}_1)) \leq a < a + \delta \leq \min(\text{diag}(\mathbf{\Lambda}_2))$$

and  $\mathbf{\Lambda}_2$  and  $\hat{\mathbf{\Lambda}}_2$  contain top- $r$  singular values of  $\mathbf{M}$  of  $\hat{\mathbf{M}}$  respectively, then

$$\max(\|\mathbf{U}_2 \mathbf{U}_2^\top - \hat{\mathbf{U}}_2 \hat{\mathbf{U}}_2^\top\|, \|\mathbf{V}_2 \mathbf{V}_2^\top - \hat{\mathbf{V}}_2 \hat{\mathbf{V}}_2^\top\|) \leq \frac{2\|\hat{\mathbf{M}} - \mathbf{M}\|}{\delta} \quad (24)$$

for  $\|\cdot\|$  is either Frobenius norm or operator norm.

*Proof.* We consider the symmetric dilation of  $\mathbf{M}$ , given by

$$\mathbf{M}^\dagger = \begin{pmatrix} 0 & \mathbf{M} \\ \mathbf{M}^\top & 0 \end{pmatrix}. \quad (25)$$

By Lemma 2(a) of [28], we let

$$\mathbf{W}_1 = \begin{pmatrix} \mathbf{U}_1 & \mathbf{U}_1 \\ \mathbf{V}_1 & -\mathbf{V}_1 \end{pmatrix}, \quad \mathbf{W}_2 = \begin{pmatrix} \mathbf{U}_2 & \mathbf{U}_2 \\ \mathbf{V}_2 & -\mathbf{V}_2 \end{pmatrix}, \quad \mathbf{\Sigma}_1 = \begin{pmatrix} \mathbf{\Lambda}_1 & 0 \\ 0 & -\mathbf{\Lambda}_1 \end{pmatrix}, \quad \mathbf{\Sigma}_2 = \begin{pmatrix} \mathbf{\Lambda}_2 & 0 \\ 0 & -\mathbf{\Lambda}_2 \end{pmatrix}$$

then we have the decomposition

$$\mathbf{M}^\dagger = \frac{1}{2} [\mathbf{W}_1 \mathbf{\Sigma}_1 \mathbf{W}_1^\top + \mathbf{W}_2 \mathbf{\Sigma}_2 \mathbf{W}_2^\top],$$

and similarly,

$$\hat{\mathbf{M}}^\dagger = \frac{1}{2}[\hat{\mathbf{W}}_1 \hat{\boldsymbol{\Sigma}}_1 \hat{\mathbf{W}}_1^\top + \hat{\mathbf{W}}_2 \hat{\boldsymbol{\Sigma}}_2 \hat{\mathbf{W}}_2^\top],$$

where

$$\hat{\mathbf{W}}_1 = \begin{pmatrix} \hat{\mathbf{U}}_1 & \hat{\mathbf{U}}_1 \\ \hat{\mathbf{V}}_1 & -\hat{\mathbf{V}}_1 \end{pmatrix}, \quad \hat{\mathbf{W}}_2 = \begin{pmatrix} \hat{\mathbf{U}}_2 & \hat{\mathbf{U}}_2 \\ \hat{\mathbf{V}}_2 & -\hat{\mathbf{V}}_2 \end{pmatrix}, \quad \hat{\boldsymbol{\Sigma}}_1 = \begin{pmatrix} \hat{\boldsymbol{\Lambda}}_1 & 0 \\ 0 & -\hat{\boldsymbol{\Lambda}}_1 \end{pmatrix}, \quad \hat{\boldsymbol{\Sigma}}_2 = \begin{pmatrix} \hat{\boldsymbol{\Lambda}}_2 & 0 \\ 0 & -\hat{\boldsymbol{\Lambda}}_2 \end{pmatrix},$$

It is easy to check that  $\|\hat{\mathbf{M}}^\dagger - \mathbf{M}^\dagger\|_{\text{op}} \leq \|\hat{\mathbf{M}} - \mathbf{M}\|_{\text{op}}$  and  $\|\hat{\boldsymbol{\Sigma}}_2 - \boldsymbol{\Sigma}_2\|_{\text{op}} \leq \|\hat{\boldsymbol{\Lambda}} - \boldsymbol{\Lambda}\|_{\text{op}}$ . Since  $\boldsymbol{\Lambda}_2$  has eigenvalues contained in  $[0, a]$ , the eigenvalues of  $\boldsymbol{\Sigma}_2$  are contained in  $[-a, a]$ . By Lemma 4,

$$\|\mathbf{W}_1^\top \mathbf{W}_2\|_{\text{op}} \leq \frac{\|\hat{\mathbf{M}}^\dagger - \mathbf{M}^\dagger\|_{\text{op}} + \|\hat{\boldsymbol{\Sigma}}_2 - \boldsymbol{\Sigma}_2\|_{\text{op}}}{\delta} = \frac{\|\hat{\mathbf{M}} - \mathbf{M}\|_{\text{op}} + \|\hat{\boldsymbol{\Lambda}}_2 - \boldsymbol{\Lambda}_2\|_{\text{op}}}{\delta}.$$

By Lemma 1 of [4],

$$\begin{aligned} \|\mathbf{W}_1^\top \mathbf{W}_2\|_{\text{op}} &\geq \frac{1}{2} \|\mathbf{W}_2 \mathbf{W}_2^\top - \hat{\mathbf{W}}_2 \hat{\mathbf{W}}_2^\top\|_{\text{op}} \\ &= \left\| \begin{pmatrix} \mathbf{U}_2 \mathbf{U}_2^\top - \hat{\mathbf{U}}_2 \hat{\mathbf{U}}_2^\top & 0 \\ 0 & \mathbf{V}_2 \mathbf{V}_2^\top - \hat{\mathbf{V}}_2 \hat{\mathbf{V}}_2^\top \end{pmatrix} \right\|_{\text{op}} \\ &= \max(\|\mathbf{U}_2 \mathbf{U}_2^\top - \hat{\mathbf{U}}_2 \hat{\mathbf{U}}_2^\top\|_{\text{op}}, \|\mathbf{V}_2 \mathbf{V}_2^\top - \hat{\mathbf{V}}_2 \hat{\mathbf{V}}_2^\top\|_{\text{op}}). \end{aligned}$$

Hence we obtain

$$\max(\|\mathbf{U}_2 \mathbf{U}_2^\top - \hat{\mathbf{U}}_2 \hat{\mathbf{U}}_2^\top\|_{\text{op}}, \|\mathbf{V}_2 \mathbf{V}_2^\top - \hat{\mathbf{V}}_2 \hat{\mathbf{V}}_2^\top\|_{\text{op}}) \leq \frac{\|\hat{\mathbf{M}} - \mathbf{M}\|_{\text{op}} + \|\hat{\boldsymbol{\Lambda}}_2 - \boldsymbol{\Lambda}_2\|_{\text{op}}}{\delta}.$$

By Corollary 2, the right hand side is upper bounded by  $2\|\hat{\mathbf{M}} - \mathbf{M}\|_{\text{op}}/\delta$ . This proves (24) for operator norm. For Frobenius norm, we have  $\|\hat{\mathbf{M}}^\dagger - \mathbf{M}^\dagger\|_{\text{F}} \leq \sqrt{2}\|\hat{\mathbf{M}} - \mathbf{M}\|_{\text{F}}$  and  $\|\hat{\boldsymbol{\Sigma}}_2 - \boldsymbol{\Sigma}_2\|_{\text{F}} \leq \sqrt{2}\|\hat{\boldsymbol{\Lambda}} - \boldsymbol{\Lambda}\|_{\text{F}}$ . By Lemma 4,

$$\|\mathbf{W}_1^\top \mathbf{W}_2\|_{\text{F}} \leq \frac{\|\hat{\mathbf{M}}^\dagger - \mathbf{M}^\dagger\|_{\text{F}} + \|\hat{\boldsymbol{\Sigma}}_2 - \boldsymbol{\Sigma}_2\|_{\text{F}}}{\delta} = \frac{\sqrt{2}\|\hat{\mathbf{M}} - \mathbf{M}\|_{\text{F}} + \sqrt{2}\|\hat{\boldsymbol{\Lambda}}_2 - \boldsymbol{\Lambda}_2\|_{\text{F}}}{\delta}.$$

By Wielandt-Hoffman Theorem [22],  $\|\hat{\boldsymbol{\Lambda}}_2 - \boldsymbol{\Lambda}_2\|_{\text{F}} \leq \|\hat{\mathbf{M}} - \mathbf{M}\|_{\text{F}}$ . Therefore, the right hand side is upper bounded by  $2\sqrt{2}\|\hat{\mathbf{M}} - \mathbf{M}\|_{\text{F}}/\delta$ . By Lemma 1 of [4] again,

$$\begin{aligned} \|\mathbf{W}_1^\top \mathbf{W}_2\|_{\text{F}} &= \frac{1}{\sqrt{2}} \|\mathbf{W}_2 \mathbf{W}_2^\top - \hat{\mathbf{W}}_2 \hat{\mathbf{W}}_2^\top\|_{\text{F}} \\ &= \sqrt{2} \left\| \begin{pmatrix} \mathbf{U}_2 \mathbf{U}_2^\top - \hat{\mathbf{U}}_2 \hat{\mathbf{U}}_2^\top & 0 \\ 0 & \mathbf{V}_2 \mathbf{V}_2^\top - \hat{\mathbf{V}}_2 \hat{\mathbf{V}}_2^\top \end{pmatrix} \right\|_{\text{F}} \\ &= \sqrt{2\|\mathbf{U}_2 \mathbf{U}_2^\top - \hat{\mathbf{U}}_2 \hat{\mathbf{U}}_2^\top\|_{\text{F}}^2 + 2\|\mathbf{V}_2 \mathbf{V}_2^\top - \hat{\mathbf{V}}_2 \hat{\mathbf{V}}_2^\top\|_{\text{F}}^2} \\ &\geq \sqrt{2} \max(\|\mathbf{U}_2 \mathbf{U}_2^\top - \hat{\mathbf{U}}_2 \hat{\mathbf{U}}_2^\top\|_{\text{F}}, \|\mathbf{V}_2 \mathbf{V}_2^\top - \hat{\mathbf{V}}_2 \hat{\mathbf{V}}_2^\top\|_{\text{F}}). \end{aligned}$$

This completes the proof of (24).  $\square$

**Theorem 6** (Weyl's inequality, Corollary III.2.6 of [1]). *Suppose  $\mathbf{A}$  and  $\mathbf{B}$  are  $n \times n$  real symmetric matrices and let  $\sigma_1(\mathbf{A}) \geq \sigma_2(\mathbf{A}) \geq \dots \geq \sigma_n(\mathbf{A})$  and  $\sigma_1(\mathbf{B}) \geq \sigma_2(\mathbf{B}) \geq \dots \geq \sigma_n(\mathbf{B})$  be the eigenvalues of  $\mathbf{A}$  and  $\mathbf{B}$  respectively, then*

$$\max_{i=1, \dots, n} |\sigma_i(\mathbf{A}) - \sigma_i(\mathbf{B})| \leq \|\mathbf{A} - \mathbf{B}\|_{\text{op}}. \quad (26)$$

**Corollary 2.** *Suppose  $\mathbf{A}$  and  $\mathbf{B}$  are not necessarily symmetric and  $\sigma_i(\mathbf{A})$  and  $\sigma_i(\mathbf{B})$  are singular values, the inequality (26) still holds.*

*Proof.* We consider the symmetric dilation (25) of  $\mathbf{A}$  and  $\mathbf{B}$ , denoted by  $\mathbf{A}^\dagger$  and  $\mathbf{B}^\dagger$  respectively. Then  $\mathbf{A}^\dagger$  has eigenvalues  $\sigma_1(\mathbf{A}) \geq \sigma_2(\mathbf{A}) \geq \dots \geq \sigma_n(\mathbf{A}) \geq 0 \geq -\sigma_n(\mathbf{A}) \geq \dots \geq -\sigma_2(\mathbf{A}) \geq -\sigma_1(\mathbf{A})$ . The eigenvalues of  $\mathbf{B}^\dagger$  are similar. Then we apply the fact that  $\|\mathbf{A} - \mathbf{B}\|_{\text{op}} = \|\mathbf{A}^\dagger - \mathbf{B}^\dagger\|_{\text{op}}$  and Weyl's inequality to obtain the result.  $\square$

Now we are ready to prove Theorem 4. Let  $\mathbf{M} = \mathbf{U}_1\mathbf{\Lambda}_1\mathbf{V}_1^\top + \mathbf{U}_2\mathbf{\Lambda}_2\mathbf{V}_2^\top$  and  $\hat{\mathbf{M}} = \hat{\mathbf{U}}_1\hat{\mathbf{\Lambda}}_1\hat{\mathbf{V}}_1^\top + \hat{\mathbf{U}}_2\hat{\mathbf{\Lambda}}_2\hat{\mathbf{V}}_2^\top$  be singular value decompositions of  $\mathbf{M}$  and  $\hat{\mathbf{M}}$  respectively, where  $\text{diag}(\mathbf{\Lambda}_2) = (\sigma_1(\mathbf{M}), \dots, \sigma_r(\mathbf{M}))$  and  $\text{diag}(\hat{\mathbf{\Lambda}}_2) = (\sigma_1(\hat{\mathbf{M}}), \dots, \sigma_r(\hat{\mathbf{M}}))$  contains top- $r$  singular values. By Corollary 2, we have

$$\|\hat{\mathbf{\Lambda}}_2 - \mathbf{\Lambda}_2\|_{\text{op}} \leq \|\hat{\mathbf{M}} - \mathbf{M}\|_{\text{op}}.$$

By Corollary 1,

$$\begin{aligned} \max(\|\mathbf{U}_2\mathbf{U}_2^\top - \hat{\mathbf{U}}_2\hat{\mathbf{U}}_2^\top\|_{\text{op}}, \|\mathbf{V}_2\mathbf{V}_2^\top - \hat{\mathbf{V}}_2\hat{\mathbf{V}}_2^\top\|_{\text{op}}) &\leq \frac{\|\hat{\mathbf{M}} - \mathbf{M}\|_{\text{op}} + \|\hat{\mathbf{\Lambda}}_2 - \mathbf{\Lambda}_2\|_{\text{op}}}{\sigma} \\ &\leq \frac{2\|\hat{\mathbf{M}} - \mathbf{M}\|_{\text{op}}}{\sigma}. \end{aligned}$$

Now we apply Theorem 2.1 of [16],

$$\mathbb{P}(\|\hat{\mathbf{M}} - \mathbf{M}\|_{\text{op}} \lesssim \sqrt{n_1 p}) \geq 1 - n^{-1}.$$

On the event of  $\|\hat{\mathbf{M}} - \mathbf{M}\|_{\text{op}} \lesssim \sqrt{n_1 p}$ , we have

$$\begin{aligned} \max(\|\mathbf{U}_2\mathbf{U}_2^\top - \hat{\mathbf{U}}_2\hat{\mathbf{U}}_2^\top\|_{\text{op}}, \|\mathbf{V}_2\mathbf{V}_2^\top - \hat{\mathbf{V}}_2\hat{\mathbf{V}}_2^\top\|_{\text{op}}) &\leq \frac{2\|\hat{\mathbf{M}} - \mathbf{M}\|_{\text{op}}}{\sigma} \\ &\lesssim \frac{\sqrt{n_1 p}}{\sigma}. \end{aligned}$$

For Frobenius norm, we have that  $\|\hat{\mathbf{\Lambda}}_2 - \mathbf{\Lambda}_2\|_{\text{F}} \leq \sqrt{r}\|\hat{\mathbf{\Lambda}}_2 - \mathbf{\Lambda}_2\|_{\text{op}} \leq \sqrt{r}\|\hat{\mathbf{M}} - \mathbf{M}\|_{\text{op}}$  by Corollary 2,

$$\begin{aligned} \max(\|\mathbf{U}_2\mathbf{U}_2^\top - \hat{\mathbf{U}}_2\hat{\mathbf{U}}_2^\top\|_{\text{F}}, \|\mathbf{V}_2\mathbf{V}_2^\top - \hat{\mathbf{V}}_2\hat{\mathbf{V}}_2^\top\|_{\text{F}}) &\leq \frac{\|\hat{\mathbf{M}} - \mathbf{M}\|_{\text{F}} + \|\hat{\mathbf{\Lambda}}_2 - \mathbf{\Lambda}_2\|_{\text{F}}}{\sigma} \\ &\leq \frac{2\sqrt{r}\|\hat{\mathbf{M}} - \mathbf{M}\|_{\text{op}}}{\sigma} \\ &\lesssim \frac{\sqrt{n_1 p r}}{\sigma}. \end{aligned}$$

## E Proof of Theorem 5

We firstly consider the case  $r > 1$ . Let integer  $k_2 \geq 1$ ,  $\sigma > 0$  and  $\mu \in (0, 1)$  be given by

$$k_2 = \lceil (10/p)^2 \sigma_*^2 / n_1 \rceil, \quad \sigma^2 = n_1 k_2 (p/10)^2, \quad \mu^2 = \min\{21/(2k_2 p), 0.1\}/2. \quad (27)$$

Clearly  $\sigma_* \leq \sigma \leq \sqrt{2}\sigma_*$ . As  $r\sigma_*^2 \leq n_1 n_2 p^2 / C_0$ ,  $k_2 \leq 200n_2 / (rC_0) \leq (n_2 - 1) / (2r - 2)$  for sufficiently large  $C_0$ . This allows the following construction. Let  $\mathbf{H} \in [-\sqrt{3}, \sqrt{3}]^{n_1 \times (r-1)}$  such that  $(\mathbf{H}, \mathbf{1}_{n_1})^\top (\mathbf{H}, \mathbf{1}_{n_1}) / n_1 = \mathbf{I}_r$ . Let  $\mathbf{U}_i, i = 1, \dots, N$ , be distinct matrices in  $\{-1, 1\}^{n_1 \times (r-1)}$ , with  $N = 2^{n_1(r-1)}$ ,  $\mathbf{W}_i = \sqrt{1 - \mu^2} \mathbf{H} + \mu \mathbf{U}_i$  with  $0 < \mu < 1$ , and

$$\mathbf{M}_i = \frac{p}{2} \mathbf{1}_{n_1 \times n_2} + \frac{p}{10} (\mathbf{W}_i, -\mathbf{W}_i, \dots, \mathbf{W}_i, -\mathbf{W}_i, \mathbf{O}), \quad (28)$$

where  $(\mathbf{W}_i, -\mathbf{W}_i)$  is repeated  $k_2$  times. As  $\|\mathbf{W}_i\|_{\infty} \leq \sqrt{(1 - \mu^2)3} + \mu \leq 2$ ,  $\mathbf{M}_i \in [0.3p, 0.7p]^{n_1 \times n_2}$ . Let  $\mathbf{P}_i = \mathbf{P}_{\mathbf{M}_i} = \mathbf{M}_i \mathbf{M}_i^\dagger \in \mathbb{R}^{n_1 \times n_1}$  be the orthogonal projection to the column space of  $\mathbf{M}_i$  and  $\mathbf{X}_i = (\mathbf{W}_i, \mathbf{1}_{n_1}) = (\sqrt{1 - \mu^2} \mathbf{H} + \mu \mathbf{U}_i, \mathbf{1}_{n_1}) \in \mathbb{R}^{n_1 \times r}$ . When  $\text{rank}(\mathbf{X}_i) = r$ ,  $\mathbf{X}_i$  has the same column space as  $\mathbf{M}_i$  and  $\mathbf{P}_i = \mathbf{X}_i (\mathbf{X}_i^\top \mathbf{X}_i)^{-1} \mathbf{X}_i^\top$ . Let

$$\mathbf{V}_{i,j} = \left( \begin{array}{c|c} \mathbf{U}_i^\top \mathbf{U}_j / n_1 & \mathbf{0} \\ \hline \mathbf{0}^\top & 1 \end{array} \right), \quad \Delta_i = \frac{\mu}{n_1} \left( \begin{array}{c|c} \sqrt{1 - \mu^2} \mathbf{U}_i^\top \mathbf{H} & \mathbf{U}_i^\top \mathbf{1}_{n_1} \\ \hline \mathbf{0}^\top & 0 \end{array} \right),$$

and  $\Delta_{i,j} = \Delta_i + \Delta_j^\top + \mu^2 (\mathbf{V}_{i,i} - \mathbf{I}_r) I_{\{i=j\}}$ . By algebra, we have

$$n_1^{-1} \mathbf{X}_i^\top \mathbf{X}_j = \begin{cases} \mathbf{I}_r + \Delta_{i,j} + \mu^2 (\mathbf{V}_{i,j} - \mathbf{I}_r), & i \neq j, \\ \mathbf{I}_r + \Delta_{i,i}, & i = j. \end{cases} \quad (29)$$

Thus,  $\text{rank}(\mathbf{X}_i) = r$  when  $\|\Delta_{i,i}\|_{\text{op}} < 1$ . Let  $\sigma_r(\cdot)$  denote the  $r$ -th largest singular value. We have

$$\sigma_r(\mathbf{M}_i) \geq (p/10) \sqrt{n_1 2k_2 (1 - 2\mu^2 \Delta'_i - \mu^2 \Delta''_i - (1 + 1/92)\mu^4 (\Delta'''_i)^2)_+}$$

by Lemma 6, where  $\Delta'_i = \|\mathbf{U}_i^\top \mathbf{H}/(n_1 \mu)\|_{\text{op}}$ ,  $\Delta''_i = \|\mathbf{U}_i^\top \mathbf{U}_i/n_1 - \mathbf{I}_{r-1}\|_{\text{op}}$ , and  $\Delta'''_i = \|\mathbf{U}_i^\top \mathbf{1}_{n_1}/(n_1 \mu)\|_2$ .

Let  $\varepsilon_n$  satisfying  $0 < \varepsilon_n \leq 1/(8\mu^2)$  to be determined later and  $\Omega^* = \{i \leq N : \Delta'_i \vee \Delta''_i \vee \Delta'''_i \leq \varepsilon_n\}$ . As  $\|\Delta_{i,i}\|_{\text{op}} \leq \mu^2 \Delta'_i + \mu^2 \Delta'''_i$  and  $\|\mathbf{V}_{i,i} - \mathbf{I}_r\|_{\text{op}} = \Delta''_i$ , we have  $\|\Delta_{i,i}\|_{\text{op}} \leq 5\mu^2 \varepsilon_n$  for  $i \in \Omega^*$  and

$$\{i \in \Omega^*\} \Rightarrow \{\mathbf{M}_i \in [0.3p, 0.7p]^{n_1 \times n_2}, \sigma_r(\mathbf{M}_i) \geq \sigma \geq \sigma_*, \text{rank}(\mathbf{X}_i) = r\}. \quad (30)$$

as  $\sigma_r^2(\mathbf{M}_i) \geq (p/10)^2 n_1 2k_2 (1 - 4\mu^2 \varepsilon_n)_+ \geq (p/10)^2 n_1 k_2 = \sigma^2 \geq \sigma_*^2$  by (27) for  $i \in \Omega^*$ .

Moreover, for  $\{i, j\}$  in  $\Omega^*$ ,  $\|\Delta_{i,j}\|_{\text{op}} \leq (4 + I_{\{i=j\}})\mu^2 \varepsilon_n$ , so that inserting (29) into  $\text{tr}(\mathbf{P}_i \mathbf{P}_j) = \text{tr}((\mathbf{X}_i^\top \mathbf{X}_i)^{-1} \mathbf{X}_i^\top \mathbf{X}_j (\mathbf{X}_j^\top \mathbf{X}_j)^{-1} \mathbf{X}_j^\top \mathbf{X}_i)$  yields

$$\begin{aligned} \text{tr}(\mathbf{P}_i \mathbf{P}_j) &\leq r + (C_1 - 1)\mu^2 \varepsilon_n r + \mu^2 (1 - \mu^2) \text{tr}(\mathbf{V}_{i,j} + \mathbf{V}_{j,i} - 2\mathbf{I}_r) + \mu^4 \text{tr}(\mathbf{V}_{i,j} \mathbf{V}_{j,i} - \mathbf{I}_r) \\ &\leq r + C_1 \mu^2 \varepsilon_n r + \mu^2 (1 - \mu^2) \text{tr}(\mathbf{V}_{i,j} + \mathbf{V}_{j,i} - \mathbf{V}_{i,i} - \mathbf{V}_{j,j}) \\ &= r + C_1 \mu^2 \varepsilon_n r - \mu^2 (1 - \mu^2) \|\mathbf{U}_i - \mathbf{U}_j\|_{\text{F}}^2 / n_1, \quad \forall i, j \in \Omega^*, \end{aligned} \quad (31)$$

where  $C_1$  is a numerical constant. We provide the details of this calculation in Lemma 7.

Let  $\mathbf{U}, \mathbf{M}, \mathbf{P}$  be random matrices with the uniform prior distribution  $\pi(\cdot)$ ,

$$\pi(i) = \mathbb{P}_\pi(\mathbf{U} = \mathbf{U}_i, \mathbf{M} = \mathbf{M}_i, \mathbf{P}_M = \mathbf{P}_i) = 1/N = 2^{-n_1(r-1)},$$

so that the elements of  $\mathbf{U}$  are i.i.d. Rademacher variables under  $\mathbb{P}_\pi$ . Let  $\mathcal{U}^* = \{\mathbf{U}_i : i \in \Omega^*\}$ ,  $\pi^*$  be the uniform prior on  $\Omega^*$  and  $\mathbb{P}_{\pi^*}$  the corresponding joint probability so that  $\mathbb{P}_{\pi^*}$  is the conditional probability given  $\mathbf{U} \in \mathcal{U}^*$  under  $\mathbb{P}_\pi$ . By (30),  $\mathbb{P}_{\pi^*}\{\mathbf{U} \in \Theta_2(n_1, n_2, p, r, \sigma)\} = 1$  and (12) holds.

It remains to prove (14). By (31) and the details given in Lemma 8, the Frobenius risk of the Bayes estimator under  $\mathbb{P}_{\pi^*}$  is bounded by

$$R_{\pi^*}^{\text{Bayes}} = \mathbb{E}_{\pi^*} \left[ \|\hat{\mathbf{P}}^* - \mathbf{P}_M\|_{\text{F}}^2 \right] \geq \mu^2 (1 - \mu^2) n_1^{-1} \mathbb{E}_{\pi^*} \left[ \|\hat{\mathbf{U}}^* - \mathbf{U}\|_{\text{F}}^2 \right] - C_1 \mu^2 \varepsilon_n r \quad (32)$$

where  $\hat{\mathbf{P}}^*$  and  $\hat{\mathbf{U}}^*$  are respectively the posterior mean of  $\mathbf{P}_M$  and  $\mathbf{U}$  under  $\mathbb{P}_{\pi^*}$ . Moreover,  $\|\hat{\mathbf{U}}^*\|_{\text{F}}^2 \vee \|\mathbf{U}\|_{\text{F}}^2 \leq r n_1$  always holds, so that

$$\mathbb{E}_{\pi^*} \left[ \|\hat{\mathbf{U}}^* - \mathbf{U}\|_{\text{F}}^2 \right] + \mathbb{P}_\pi(\Omega^{*c}) 4n_1 r \geq \mathbb{E}_\pi \left[ \|\hat{\mathbf{U}}^* - \mathbf{U}\|_{\text{F}}^2 \right] \geq \mathbb{E}_\pi \left[ \|\hat{\mathbf{U}} - \mathbf{U}\|_{\text{F}}^2 \right], \quad (33)$$

where  $\hat{\mathbf{U}}$  is the Bayes estimator of  $\mathbf{U}$  under  $\mathbb{P}_\pi$ , due to the optimality of  $\hat{\mathbf{U}}$  under  $\mathbb{P}_\pi$ .

Under  $\mathbb{P}_\pi$ , the elements of  $\mathbf{A}$  are independent conditionally on  $\mathbf{U}$  and the elements of  $\mathbf{U}$  are i.i.d. Rademacher. Moreover, as  $(\mathbf{W}_i, -\mathbf{W}_i)$  is repeated  $k_2$  times, conditionally on  $\mathbf{U}$  the  $k_2$  i.i.d. copies of  $(A_{i,j}, A_{i,j+r-1})$  are sufficient statistics for the estimation of the  $(i, j)$  element  $U_{i,j}$  of  $\mathbf{U}$  such that  $A_{i,j}$  and  $A_{i,j+r-1}$  are independent Bernoulli variables with probabilities  $p_{i,j} + (\mu p/10)U_{i,j} \in [0.3p, 0.7p]$  and  $q_{i,j} - (\mu p/10)U_{i,j} \in [0.3p, 0.7p]$  respectively for some  $p_{i,j}$  and  $q_{i,j}$  satisfying the constraints. Thus, by Lemma 9, the risk of the Bayes estimator is bounded by

$$\mathbb{E}_\pi \left[ (\hat{U}_{i,j} - U_{i,j})^2 \right] \geq 1 - 2k_2 (\mu p/10)^2 / (0.3p(1 - 0.3p)) \geq 1 - 2\mu^2 k_2 p/21.$$

By (27)  $\mu^2 = \{(21/(2k_2 p)) \wedge 0.1\}/2$ , so that  $(1 - \mu^2 k_2 p/21) \geq 1/2$  and  $1 - \mu^2 \geq 0.95$ . Thus, by (32) and (33), it follows that

$$\begin{aligned} R_{\pi^*}^{\text{Bayes}} &\geq \mu^2 (1 - \mu^2) (n_1^{-1} \mathbb{E}_\pi \left[ \|\hat{\mathbf{U}} - \mathbf{U}\|_{\text{F}}^2 \right] - \mathbb{P}_\pi(\Omega^{*c}) 4r) - C_1 \mu^2 r \varepsilon_n \\ &\geq 0.475 \mu^2 r - (4\mathbb{P}_\pi(\Omega^{*c}) + C_1 \varepsilon_n) \mu^2 r. \end{aligned}$$

This gives (14) when  $4\mathbb{P}_\pi(\Omega^{*c}) + C_1 \varepsilon_n \leq 0.075 = 3/40$ . To this end, we pick

$$\varepsilon_n = \max \left\{ \sqrt{40\pi r \sigma^2 / (n_1^2 p)} + \sqrt{160x_0 \sigma^2 / (n_1^2 p)}, 4\sqrt{(3r + x_0)/n_1} \right\}$$

with  $x_0 = \log(320)$  satisfying  $16e^{-x_0} = 0.05$  As  $\sigma^2 \leq 2\sigma_*^2 \leq 2n_1 n_2 p^2 r^{-1}/C_0$  and  $C_0 r \leq n_1$ .

$$\varepsilon_n \leq \max \left\{ \sqrt{80\pi p/C_0} + \sqrt{320x_0 p/C_0}, 4\sqrt{(3 + x_0)/C_0} \right\}.$$

Thus,  $\mu^2 \varepsilon_n \leq 1/8$  and  $C_1 \varepsilon_n \leq 1/40$  for sufficiently large  $C_0$ . Moreover, Lemma 5 provides

$$4\mathbb{P}_\pi\{\Omega^{*c}\} \leq 16e^{-x_0} \leq 1/20,$$

so that  $4\mathbb{P}_\pi(\Omega^{*c}) + C_1 \varepsilon_n \leq 3/40$  indeed holds. Consequently, by (27)

$$R_{\pi^*}^{\text{Bayes}} \geq 0.4r\mu^2 = 0.2 \min\{21/(2k_2p), 0.1\} = 0.2 \min\{0.105n_1p/\sigma^2, 0.1\}.$$

This gives (14) and completes the proof for  $r > 1$ .

The proof for  $r = 1$  is simpler but the construction is slightly different. Let  $\mathbf{u}_i \in \{-1, 1\}^{n_1}$ ,  $\mathbf{w}_i = (p/2)\mathbf{1}_{n_1} + (p/10)\mathbf{u}_i$ , and  $\mathbf{M}_i = \mathbf{w}_i \mathbf{1}_{n_2}^\top$ . For  $1/C_0 \leq 0.16$ , we have

$$\mathbf{M}_i \in [0.4p, 0.6p]^{n_1 \times n_2}, \sigma_1^2(\mathbf{M}_i) \geq (0.4p)^2 n_1 n_2 \geq \sigma_*^2, \text{rank}(\mathbf{M}_i) = 1.$$

Let  $\mathbf{P}_{\mathbf{M}_i} = \mathbf{w}_i \mathbf{w}_i^\top / \|\mathbf{w}_i\|_2^2$  and  $T_{i,j} = \mathbf{w}_i^\top \mathbf{w}_j / n_1$ . We have

$$\|\mathbf{P}_{\mathbf{M}_i} - \mathbf{P}_{\mathbf{M}_j}\|_F^2 = 2(T_{i,i}T_{j,j} - T_{i,j}^2)/T_{i,i}T_{j,j}.$$

Let  $\Omega^* = \{i : |\mathbf{u}_i^\top \mathbf{1}_{n_1} / (\mu n_1)| \leq \varepsilon_n\}$ . For  $\{i, j\} \subset \Omega^*$ ,

$$\begin{aligned} T_{i,j} &= n_1^{-1}(\mu \mathbf{u}_i + \sqrt{1 - \mu^2} \mathbf{1}_{n_1})^\top (\mu \mathbf{u}_j + \sqrt{1 - \mu^2} \mathbf{1}_{n_1}) \\ &= n_1^{-1}(-\mu^2 \|\mathbf{u}_i - \mathbf{u}_j\|_2^2 + \mu \sqrt{1 - \mu^2} (\mathbf{u}_i + \mathbf{u}_j)^\top \mathbf{1}_{n_1}) + 1, \end{aligned}$$

so that  $|T_{i,i} - 1| \leq 2\mu^2 \varepsilon_n$ .

$$\begin{aligned} &T_{i,i}T_{j,j} - T_{i,j}^2 \\ &= 2n_1^{-1}\mu^2 \|\mathbf{u}_i - \mathbf{u}_j\|_2^2 - n_1^{-2}\mu^4 \|\mathbf{u}_i - \mathbf{u}_j\|_2^4 - \mu^2(1 - \mu^2)((\mathbf{u}_i - \mathbf{u}_j)^\top \mathbf{1}_{n_1}/n_1)^2 \\ &\quad + n_1^{-2}\mu^2 \|\mathbf{u}_i - \mathbf{u}_j\|_2^2 \mu \sqrt{1 - \mu^2} (\mathbf{u}_i + \mathbf{u}_j)^\top \mathbf{1}_{n_1} \\ &\geq n_1^{-1}\mu^2 \|\mathbf{u}_i - \mathbf{u}_j\|_2^2 (2 - 4\mu^2 - 2\mu^2 \varepsilon_n) - 4\mu^4(1 - \mu^2)\varepsilon_n^2. \end{aligned}$$

We omit the rest of the proof as they are almost identical to the case of  $r > 1$ .

**Lemma 5.** Let  $\mathbf{H} \in \{-1, 1\}^{n_1 \times (r-1)}$  such that  $(\mathbf{H}, \mathbf{1}_{n_1})^\top (\mathbf{H}, \mathbf{1}_{n_1}) / n_1 = \mathbf{I}_r$ . Let  $r \geq 2$  and  $\mathbf{U} \in \{-1, 1\}^{n_1 \times (r-1)}$  with i.i.d. Rademacher entries. Then,

$$\mathbb{P}\left\{\begin{aligned} \|\mathbf{U}^\top \mathbf{H} / n_1\|_{\text{op}} \vee \|\mathbf{U}^\top \mathbf{1}_{n_1} / n_1\|_2 &\leq \sqrt{2\pi(r-1)/n_1} + \sqrt{8x/n_1} \\ \|\mathbf{U}^\top \mathbf{U} / n_1 - \mathbf{I}_{r-1}\|_{\text{op}} &\leq 4\sqrt{(3(r-1) + x)/n_1} \end{aligned}\right\} \geq 1 - 4e^{-x}.$$

Suppose  $n_1 p \leq \sigma^2$ . Let  $\mu^2 = (n_1 p / \sigma^2) / 20$ . Then, for

$$\varepsilon_n = \max\left\{\sqrt{40\pi r \sigma^2 / (n_1^2 p)} + \sqrt{160x\sigma^2 / (n_1^2 p)}, 4\sqrt{(3r + x)/n_1}\right\},$$

$\mathbb{P}\{\Delta'_i \vee \Delta''_i \vee \Delta'''_i \leq \varepsilon_n\} \geq 1 - 4e^{-x}$ .

*Proof.* Let  $\mathbf{U} = (\mathbf{u}_1, \dots, \mathbf{u}_{n_1})^\top$  and  $\|\mathbf{v}\|_2 = 1$ . As  $\mathbb{E}(\mathbf{v}^\top \mathbf{u}_i)^{2m} \leq \mathbb{E}(N(0, 1))^{2m}$  for all  $m$ , for  $t < 1/2$

$$\mathbb{E} \exp(t((\mathbf{v}^\top \mathbf{u}_i)^2 - 1)) \leq \mathbb{E} \exp(t(N(0, 1))^2 - 1) \leq \frac{e^{-t}}{(1 - 2t)^{1/2}} \leq \exp(t^2/(1 - 2t))$$

As  $\mathbb{E}(1 - (\mathbf{v}^\top \mathbf{u}_i)^2)^2 = \mathbb{E}(\mathbf{v}^\top \mathbf{u}_i)^4 - 1 \leq 2$ ,

$$\mathbb{E} \exp(t(1 - (\mathbf{v}^\top \mathbf{u}_i)^2)) \leq 1 + 2(e^t - 1 - t) \leq \exp(t^2/(1 - 2t))$$

By the Bernstein inequality,

$$\mathbb{P}\left\{|\mathbf{v}^\top (\mathbf{I}_{r-1} - \mathbf{U}^\top \mathbf{U} / n_1) \mathbf{v}| \geq 2\sqrt{x/n_1} + 4x/n_1\right\} \leq 2e^{-x}$$

Let  $\varepsilon = 0.12$  and  $N_\varepsilon \leq (1 + 2/\varepsilon)^{r-1}$  be the  $\varepsilon$ -covering number for the unit ball in  $\mathbb{R}^{r-1}$ . We have

$$(1 - 2\varepsilon)\|\mathbf{U}^\top \mathbf{U} / n_1 - \mathbf{I}_{r-1}\|_{\text{op}} \leq \max_{j \leq N_\varepsilon} |\mathbf{v}_j (\mathbf{U}^\top \mathbf{U} / n_1 - \mathbf{I}_{r-1}) \mathbf{v}_j|$$

with certain  $\mathbf{v}_j$  with  $\|\mathbf{v}_j\|_2 = 1$ . Thus, as  $1/(1 - 2\varepsilon) \leq 4/3$  and  $\log(1 + 2/\varepsilon) \leq 3$ ,

$$\mathbb{P}\{\|\mathbf{U}^\top \mathbf{U}/n_1 - \mathbf{I}_{r-1}\|_{\text{op}} \geq (8/3)\sqrt{(3(r-1) + x)/n_1} + 16(3(r-1) + x)/(3n_1)\} \leq 2e^{-x}.$$

When  $4\sqrt{(3(r-1) + x)/n_1} < 1$ , this implies

$$\mathbb{P}\{\|\mathbf{U}^\top \mathbf{U}/n_1 - \mathbf{I}_{r-1}\|_{\text{op}} \geq 4\sqrt{(3(r-1) + x)/n_1}\} \leq 2e^{-x}.$$

Let  $f(\mathbf{U}) = \|\mathbf{U}^\top \mathbf{H}/n_1^{1/2}\|_{\text{op}}$ . As  $\mathbf{H}^\top \mathbf{H}/n_1 = \mathbf{I}_{r-1}$ ,  $f(\cdot)$  is a unit-Lipschitz function, so that

$$\mathbb{P}\{f(\mathbf{U}) > \mathbb{E}f(\mathbf{U}) + t\} \leq e^{-t^2/8}.$$

Let  $\mathbf{Z}$  be a standard Gaussian matrix. By the Sudakov-Fernique inequality

$$\mathbb{E}[|N(0, 1)|] \mathbb{E}f(\mathbf{U}) \leq \mathbb{E}f(\mathbf{Z}) \leq 2\sqrt{r-1}$$

The proof is complete as the proof for  $\mathbf{H}$  also applies with  $\mathbf{H}$  is replaced by  $\mathbf{1}_{n_1}$ .  $\square$

**Lemma 6.** *Let  $\mathbf{M}_i$  be as in (28),  $\Delta'_i = \|\mathbf{U}_i^\top \mathbf{H}/(n_1\mu)\|_{\text{op}}$ ,  $\Delta''_i = \|\mathbf{U}_i^\top \mathbf{U}_i/n_1 - \mathbf{I}_{r-1}\|_{\text{op}}$  and  $\Delta'''_i = \|\mathbf{U}_i^\top \mathbf{1}_{n_1}/(n_1\mu)\|_2$ . Then, the  $r$ -th singular value of  $\mathbf{M}_i$  is bounded by  $\sigma_r(\mathbf{M}_i) \geq (p/10)\sqrt{n_1 2k_2(1 - 2\mu^2\Delta'_i - \mu^2\Delta''_i - (1 + 1/92)\mu^4(\Delta'''_i)^2)_+}$ .*

*Proof.* Write  $\bar{\mathbf{H}} = (\mathbf{H}, -\mathbf{H})$ ,  $\mathbf{M}_1 = \sqrt{1 - \mu^2} \bar{\mathbf{H}} + 5\mathbf{1}_{n_1 \times (2r-2)}$  and  $\bar{\mathbf{U}}_i = (\mathbf{U}_i, -\mathbf{U}_i)$ . We have

$$\sigma_r^2(\mathbf{M}_i)/n_1 = \sigma_r(\mathbf{M}_i^\top \mathbf{M}_i)/n_1 \geq k_2(p/10)^2 \sigma_r((\mathbf{M}_1 + \mu\bar{\mathbf{U}}_i)^\top (\mathbf{M}_1 + \mu\bar{\mathbf{U}}_i)/n_1).$$

Let  $\bar{\mathbf{I}}_{r-1} = (\mathbf{I}_{r-1}, -\mathbf{I}_{r-1})$  and  $\bar{\mathbf{u}}_i = \bar{\mathbf{U}}_i^\top \mathbf{1}_{n_1}/n_1$ . As  $\|\bar{\mathbf{U}}_i^\top \bar{\mathbf{U}}_i/n_1 - \bar{\mathbf{I}}_{r-1}^\top \bar{\mathbf{I}}_{r-1}\|_{\text{op}} = 2\Delta''_i$ ,

$$\begin{aligned} & \sigma_r((\mathbf{M}_1 + \mu\bar{\mathbf{U}}_i)^\top (\mathbf{M}_1 + \mu\bar{\mathbf{U}}_i)/n_1) \\ & \geq \sigma_r(\mathbf{M}_1^\top \mathbf{M}_1/n_1 + \mu^2 \bar{\mathbf{U}}_i^\top \bar{\mathbf{U}}_i/n_1 + 5\mu \bar{\mathbf{u}}_i \mathbf{1}_{2r-2}^\top + 5\mu \mathbf{1}_{2r-2} \bar{\mathbf{u}}_i^\top) \\ & \quad - \mu \|\bar{\mathbf{U}}_i^\top \bar{\mathbf{H}}/n_1 + \bar{\mathbf{H}}^\top \bar{\mathbf{U}}_i/n_1\|_{\text{op}} \\ & \geq \sigma_r(\mathbf{M}_1^\top \mathbf{M}_1/n_1 + \mu^2 \bar{\mathbf{I}}_{r-1}^\top \bar{\mathbf{I}}_{r-1} + 5\mu \bar{\mathbf{u}}_i \mathbf{1}_{2r-2}^\top + 5\mu \mathbf{1}_{2r-2} \bar{\mathbf{u}}_i^\top) - 2\mu^2 \Delta''_i - 4\mu^2 \Delta'_i \end{aligned}$$

by Weyl's inequality.

Assume  $\|\bar{\mathbf{u}}_i\|_2 = \sqrt{2}\mu\Delta'''_i > 0$ . As  $\mathbf{M}_1^\top \mathbf{M}_1/n_1 = (1 - \mu^2)\bar{\mathbf{I}}_{r-1}^\top \bar{\mathbf{I}}_{r-1} + 25\mathbf{1}_{(2r-2) \times (2r-2)}$ ,

$$\begin{aligned} & \mathbf{M}_1^\top \mathbf{M}_1/n_1 + \mu^2 \bar{\mathbf{I}}_{r-1}^\top \bar{\mathbf{I}}_{r-1} + 5\mu \bar{\mathbf{u}}_i \mathbf{1}_{2r-2}^\top + 5\mu \mathbf{1}_{2r-2} \bar{\mathbf{u}}_i^\top \\ & = \bar{\mathbf{I}}_{r-1}^\top \bar{\mathbf{I}}_{r-1} - \frac{2\bar{\mathbf{u}}_i \bar{\mathbf{u}}_i^\top}{\|\bar{\mathbf{u}}_i\|_2^2} + \left( \frac{\mathbf{1}_{2r-2}}{\sqrt{2r-2}}, \frac{\bar{\mathbf{u}}_i}{\|\bar{\mathbf{u}}_i\|_2} \right) \begin{pmatrix} B & \sqrt{B\varepsilon} \\ \sqrt{B\varepsilon} & 2 \end{pmatrix} \begin{pmatrix} \frac{\mathbf{1}_{2r-2}}{\sqrt{2r-2}}, \frac{\bar{\mathbf{u}}_i}{\|\bar{\mathbf{u}}_i\|_2} \end{pmatrix}^\top \end{aligned}$$

with  $B = 25(2r - 2) \geq 50$  and  $\varepsilon = \mu^2 \|\bar{\mathbf{u}}_i\|_2^2 = 2\mu^4 (\Delta'''_i)^2$ . As  $\bar{\mathbf{I}}_{r-1}^\top \bar{\mathbf{I}}_{r-1}/2$  is an orthogonal projection with  $\bar{\mathbf{u}}_i/\|\bar{\mathbf{u}}_i\|_2$  as an eigenvector, the  $r$ -th eigenvalue of the above matrix is

$$\sigma'_r = (B + 2 - \sqrt{(B + 2)^2 - 4(2B - B\varepsilon)})/2.$$

For  $\varepsilon \leq 1$ ,  $\sqrt{(B + 2)^2 - 2B(4 - 2\varepsilon)} = \sqrt{(B - 2 + 2\varepsilon)^2 + 4(2\varepsilon - \varepsilon^2)} \leq B - 2 + \varepsilon + 4\varepsilon/46$ , which implies

$$\sigma'_r \geq \frac{2B(2 - \varepsilon)}{B + 2 + B - 2 + \varepsilon + 4\varepsilon/46} \geq (2 - \varepsilon)(1 - (25/46)\varepsilon/B) \geq 2 - (1 + 1/92)\varepsilon.$$

Hence, the conclusion holds. The conclusion holds automatically when  $\varepsilon > 1$ . The proof for  $\varepsilon = 0$  is simpler and omitted.  $\square$
